1  
2  
3  
4  
5  
6  
7  
8  
9  
10  
11  
12  
13  
14  
15  
16  
17  
18  
19  
20  
21  
22  
23  
24  
25  
26

Title: Dementia Risk and Dynamic Response to Exercise: A non-randomized clinical trial

Short Title: DYAMIC

Authors: Eric D Vidoni<sup>1</sup>, Jill K Morris<sup>1</sup>, Jacqueline A. Palmer,<sup>2</sup> Yanming Li<sup>3</sup>, Dreu White<sup>2</sup>, Paul J Kueck<sup>1</sup>, Casey S John<sup>1</sup>, Robyn A Honea <sup>1</sup>, Rebecca J Lepping<sup>1</sup>, Phil Lee<sup>4</sup>, Jonathan Mahnken<sup>3</sup>, Laura E Martin<sup>5</sup>, Sandra A Billinger<sup>1,2</sup>

<sup>1</sup> Department of Neurology, University of Kansas Medical Center, Kansas City, KS, USA

<sup>2</sup> Department of Physical Therapy and Rehabilitation Science, University of Kansas Medical Center, Kansas City, KS, USA

<sup>3</sup> Department of Biostatistics and Data Science, University of Kansas Medical Center, Kansas City, KS, USA

<sup>4</sup> Department of Radiology, University of Kansas Medical Center, Kansas City, KS, USA

<sup>5</sup> Department of Population Health, University of Kansas Medical Center, Kansas City, KS, USA

Corresponding Author: Eric D. Vidoni, University of Kansas Alzheimer's Disease Research Center, 4350

Shawnee Mission Parkway, MS6002, Fairway, KS 60205

Email: [evidoni@kumc.edu](mailto:evidoni@kumc.edu)

27 **Abstract**

28

29 **Background:** Physical exercise may support brain health and cognition over the course of typical aging. The  
30 goal of this nonrandomized clinical trial was to examine the effect of an acute bout of aerobic exercise on  
31 brain blood flow and blood neurotrophic factors associated with exercise response and brain function in older  
32 adults with and without possession of the APOE4 allele, a genetic risk factor for developing Alzheimer's. We  
33 hypothesized that older adult APOE4 carriers would have lower cerebral blood flow regulation and would  
34 demonstrate blunted neurotrophic response to exercise compared to noncarriers.

35 **Methods:** Sixty-two older adults (73±5 years old, 41 female) consented to this prospectively enrolling clinical  
36 trial, utilizing a single arm, single visit, experimental design, with post-hoc assessment of difference in  
37 outcomes based on APOE4 carriership. All participants completed a single 15-minute bout of moderate-  
38 intensity aerobic exercise. The primary outcome measure was change in cortical gray matter cerebral blood  
39 flow in cortical gray matter measured by magnetic resonance imaging (MRI) arterial spin labeling (ASL),  
40 defined as the total perfusion (area under the curve, AUC) following exercise. Secondary outcomes were  
41 changes in blood neurotrophin concentrations of insulin-like growth factor-1 (IGF-1), vascular endothelial  
42 growth factor (VEGF), and brain derived neurotrophic factor (BDNF).

43 **Results:** Genotyping failed in one individual (n=23 APOE4 carriers and n=38 APOE4 non-carriers) and two  
44 participants could not complete primary outcome testing. Cerebral blood flow AUC increased immediately  
45 following exercise, regardless of APOE4 carrier status. In an exploratory regional analyses, we found that  
46 cerebral blood flow increased in hippocampal brain regions, while showing no change in cerebellar brain  
47 regions across both groups. Among high interindividual variability, there were no significant changes in any of  
48 the 3 neurotrophic factors for either group immediately following exercise.

49 **Conclusions:** Our findings show that both APOE4 carriers and non-carriers show similar effects of exercise-  
50 induced increases in cerebral blood flow and neurotrophic response to acute aerobic exercise. Our results  
51 provide further evidence that acute exercise-induced increases in cerebral blood flow may be regional  
52 specific, and that exercise-induced neurotrophin release may show a differential effect in the aging  
53 cardiovascular system. Results from this study build upon previous research in younger adults by providing

54 an initial characterization of the acute brain blood flow and neurotrophin responses to a bout of exercise in  
55 older adults with and without this known risk allele for cardiovascular disease and Alzheimer's disease.

56

57 **Trials registration:** Dementia Risk and Dynamic Response to Exercise (DYNAMIC); Identifier:

58 NCT04009629

59

60 **Funding:** This study was funded by grants from the national institutes of health R21 AG061548, P30  
61 AG072973 and P30 AG035982, and the Leo and Anne Albert Charitable Trust. The Hoglund Biomedical  
62 Imaging Center is supported by a generous gift from Forrest and Sally Hoglund and funding from the National  
63 Institutes of Health including S10 RR29577, and UL1 TR002366.

## 64 Introduction

65 Many diseases of the brain and cardiovascular system share common risk factors such as hypertension,  
66 hypercholesterolemia, and genetics.(1-4) High comorbidity of cognitive decline and cardiovascular disease  
67 has focused much research on the role of cardio- and cerebrovascular health in reducing dementia risk.(5, 6)  
68 Aerobic exercise – characterized as sustained, rhythmic physical activity using large muscle groups -- is a  
69 well-known cardiovascular intervention(7) that shows positive effects on brain health,(8), including improved  
70 cognitive outcomes,(9-13) greater brain volume and cortical thickness,(14-16) and lower risk of dementia.(17,  
71 18) Randomized control trials (RCTs) involving aerobic exercise have consistently demonstrated benefits to  
72 cognition and structural brain integrity, including increased volume of the whole brain and the hippocampus, a  
73 critical neural substrate for memory formation and retention that is commonly compromised with aging.(9, 12,  
74 19-21) Increased cerebral blood flow (CBF) and exposure to blood-based trophic and hormonal factors may  
75 be key factors amongst many potential mechanisms by which aerobic exercise exerts neuroprotective and  
76 therapeutic effects on brain health. While the positive effects of aerobic exercise on brain health are well  
77 established, the acute response of CBF to a bout of aerobic exercise by older adults remains insufficiently  
78 characterized.(22-25) This is important as any benefits of exercise will necessarily result from the cumulative  
79 effects of brief acute bouts of exercise.

80 High genetic risk for Alzheimer’s disease (AD) may influence the relationship between cardiovascular  
81 and brain health. In rodents, circulating apolipoprotein is an integral to maintaining cerebrovascular integrity  
82 and mediates exercise benefits on the cerebrovasculature.(26, 27) In humans, Apolipoprotein E (APOE) is  
83 highly expressed by astrocytes and microglia in the central nervous system, and its effects in the brain are  
84 isoform-dependent. Individuals who carry the high AD-risk APOE4 isoform, a strong genetic risk factor for AD,  
85 shows weaker anti-inflammatory properties than APOE3.(28) This lower capacity to suppress brain  
86 neuroinflammatory responses has been postulated to result in poor vascular function in older adults  
87 carriers,(29) and likely explains the higher risk for both dementia and cardiovascular disease.(2-4) Prior  
88 studies have also suggested that APOE4 is associated with atypical neurovascular coupling mechanisms, a  
89 leaky blood–brain barrier, angiopathy, and disrupted nutrient transport.(30) APOE4 carriers who are  
90 cognitively normal generally have lower resting CBF, especially in regions associated with Alzheimer’s  
91 disease (AD).(31, 32)

92           There are compelling reasons to consider CBF as a key mediator of brain health. Reduced CBF and  
93 cerebrovascular dysfunction has been found to precede neurodegeneration.(32-38) Reasons for the decline  
94 in cerebral blood flow over the course of aging and age-related disease are unclear but may include  
95 diminished heart function,(39) atherosclerosis risk,(3, 40) and declining vessel morphology and health.(27,  
96 41-43) Given that brain tissue is highly dependent on blood supply, requiring up to 25% of total resting  
97 oxygen consumption, the damaging effects of reduced blood supply to brain neural tissue(44) can  
98 accumulate over time. Impairments in cerebral blood flow can promote ischemic microlesions,(45) and alter  
99 blood-brain barrier trafficking of beta-amyloid,(46) slowing beta-amyloid clearance, and promoting its  
100 accumulation in the brain.

101           To further characterize potential intermediary mechanisms between exercise and brain health we  
102 designed the present study to assess the immediate CBF response to a single bout of acute exercise.  
103 Assessing acute exercise has the benefit of providing information on the immediate changes are related to  
104 component parts of a habitual exercise program. Our driving premise was that CBF would be a biomarker of  
105 cerebrovascular change. Specifically, we hypothesized that APOE4 carriers would have lower CBF response  
106 immediately following exercise. As ancillary outcomes we also assessed vascular endothelial growth factor  
107 (VEGF), insulin-like growth factor 1 (IGF1), and brain derived neurotrophic factor (BDNF), since they have  
108 been postulated as possible neuroprotective and therapeutic mediators of exercise effects on the brain.(21,  
109 47)

110

## 111 **Methods**

112

113           The study was designed as a single arm, single visit, experimental study, with post-hoc assessment of  
114 difference based on APOE4 carriership. No randomization was used in this study. The protocol was approved  
115 by the University of Kansas Medical Center Institutional Review Board. All participants provided written  
116 informed consent consistent with the Declaration of Helsinki. This study was registered as a clinical trial  
117 (ClinicalTrials.gov, NCT04009629) following National Institutes of Health guidance.

118

119           Sixty-two English speaking adults, aged 65-85, were enrolled in the study between October 25, 2019  
and October 28, 2021. To our knowledge, there have been no peer-reviewed reports of genotype-based CBF

120 differences in response to acute exercise. Thus, we conservatively chose an estimated effect size ( $d=0.85$ )  
121 based on feasibility and prior cross-sectional data.(31, 48) We calculated that enrolling a total of 60  
122 participants would provide ~90% power with a Type 1 error rate of 5% to detect APOE4-related differences in  
123 CBF.

124 Exclusion criteria were musculoskeletal or cardiopulmonary restrictions from a physician;  
125 contraindications to MRI; anti-coagulant use; previous diagnosis of a cognitive disorder or a neurological or  
126 psychiatric condition that could result in cognitive impairment; high exercise risk classification by American  
127 College of Sports Medicine criteria unless cleared by a physician. Figure 1 provides a CONSORT-style  
128 diagram of enrollment. All testing was performed at the University of Kansas Medical Center. Participants were  
129 compensated \$100 for their time.

130

131 Figure 1 Caption

132 Figure 1. CONSORT Enrollment Flow

133

134 We have previously described our protocol for the present study and detailed method for measuring  
135 CBF before and after a single, 15-minute acute bout of moderate intensity aerobic exercise on a cycle  
136 ergometer. Intensity was titrated to 45-55% of heart rate reserve, based on age-predicted heart rate  
137 maximum.(49) The full trial protocol is described in White et al (2021).

138 The primary outcome was cortical gray matter cerebral blood flow (CBF) response, quantified by area  
139 under the curve post-exercise. Neurotrophic factor concentration change from pre- to post-exercise and  
140 regional CBF response were identified as an ancillary outcome of interest *a priori*. There were no changes to  
141 trial primary outcome after the trial commenced.

142 For CBF measurement, participant underwent two 3D GRASE pseudo-continuous arterial spin  
143 labeling (pCASL) sequences,(50-53) yielding 11 minutes and 36 seconds of pre-exercise CBF data. All  
144 pCASL sequences were collected with the same with background suppressed 3D GRASE protocol (TE/TR =  
145 22.4/4300 ms, FOV = 300 × 300 × 120 mm<sup>3</sup>, matrix = 96 × 66 × 48, Post-labeling delay = 2s, 4-segmented  
146 acquisition without partial Fourier transform reconstruction, readout duration = 23.1 ms, total scan time 5:48,  
147 2 M0 images). The two pre-exercise pCASL sequences were followed by a T1-weighted, 3D magnetization

148 prepared rapid gradient echo (MPRAGE) structural scan (TR/TE = 2300/2.95 ms, inversion time (TI) = 900  
149 ms, flip angle = 9 deg, FOV = 253 × 270 mm, matrix = 240 × 256 voxels, voxel in-plane resolution = 1.05 × 1.05  
150 mm<sup>2</sup>, slice thickness = 1.2 mm, 176 sagittal slices, in-plane acceleration factor = 2, acquisition time = 5:09).  
151 Blood pressure was monitored during the MRI via a continuous blood pressure monitoring cuff (Caretaker 4,  
152 Caretaker Medical N.A. caretakermedical.net).

153 Following the MRI, in an adjacent room, a flexible intravenous catheter was placed, and 10 mL of  
154 blood was collected in tubes containing ethylenediaminetetraacetic acid, and a separate 3mL sample in acid  
155 citrate dextrose for genotyping. Participants then sat on a cycle ergometer and, after a 5-minute warm-up,  
156 exercised for 15 minutes at a moderate intensity, 45-55% of heart rate reserve, on a cycle ergometer. Cycle  
157 resistance was titrated for the entire 15 minutes to maintain intensity. During a cooldown period, an additional  
158 10mL of blood was drawn. Then participants were then escorted back to the MRI immediately for 4  
159 consecutive pCASL sequences, identical to the pre-exercise sequences. Finally, an additional 10mL of blood  
160 was drawn.

161

## 162 ***Neuroimage Processing***

163 CBF was calculated using a process adapted from the Laboratory of Functional MRI Technology CBF  
164 Preprocess and Quantify packages for CBF calculation (loft-lab.org, ver. February 2019). We created  
165 individualized gray matter regions of interest (whole brain, hippocampus, and cerebellum as a reference  
166 region) for each participant using the Statistical Parametric Mapping CAT12 (neuro.uni-jena.de/cat, r1059  
167 2016-10-28) package for anatomical segmentation.<sup>(54)</sup> We motion corrected labeled and control pCASL  
168 images separately for each sequence, realigning each image to the first peer image following M0 image  
169 acquisition. CBF was calculated with surround subtraction of each label/control pair without bipolar  
170 gradients<sup>(55)</sup> producing a timeseries of 9 subtraction images. This was done for each pCASL sequence, or  
171 18 pre-exercise and 36 post-exercise CBF estimates. CBF area under the curve (AUC), our primary outcome  
172 measure, was calculated as the sum of the mean CBF estimate in each region of interest times over the  
173 duration of acquisition (mL\*100g tissue<sup>-1</sup>).

174

## 175 ***Blood Specimen Processing***

176 Immediately after each blood collection timepoint, plasma was centrifuged at 1500 relative centrifugal  
177 field (g) (2800 RPM) at 4°C for 10 minutes. Platelet-rich plasma was then centrifuged in four, 1.5mL aliquots  
178 at 1700g (4500 RPM) at 4°C for 15 minutes. The resulting platelet-poor plasma was separated from the pellet  
179 and snap frozen in liquid nitrogen until stored at -80°C at the end of the visit. Concentrations of IGF-1 (Alpco  
180 Diagnostics), VEGF (R&D Systems), and BDNF (R&D systems) were measured in plasma using enzyme  
181 linked immunosorbent assays. We then computed a change score between pre-exercise and immediate post-  
182 exercise levels for each analyte.

183 Whole blood was drawn and stored frozen at -80°C prior to genetic analyses using a Taqman single  
184 nucleotide polymorphism (SNP) allelic discrimination assay (ThermoFisher) to determine APOE genotype.  
185 Taqman probes were used to determine APOE4, APOE3, and APOE2 alleles to the two APOE-defining  
186 SNPs, rs429358 (C\_3084793\_20) and rs7412 (C\_904973\_10). Individuals were classified as APOE4 carrier  
187 in the presence of 1 or 2 APOE4 alleles (e.g. E3/E4, E4/E4), and remaining individuals were grouped as non-  
188 carriers.

189

### 190 **Statistical Analyses**

191 Demographic and intervention differences between APOE4 carriage groups were explored with Welch  
192 Two Sample t-test or Fisher's Exact Test as appropriate. Our a priori planned analysis of the primary CBF  
193 outcome measure was a t-test comparison of CBF AUC between APOE4 carriage groups, and a t-test  
194 comparison of pre- to post-exercise change score between e4carriage groups in our secondary blood-based  
195 neurotrophic marker levels. We also tested an exploratory linear mixed effects model with a random intercept  
196 coefficient for each participant. P-values were obtained by likelihood ratio tests of the full model against the  
197 model without the interaction or factor in question. For our exploratory analyses, we compared change in the  
198 AUC of the 2 pre-exercise ASL sequences and the AUC of the final 2 post-exercise ASL sequences across 3  
199 regions of interest (cortex, cerebellum, hippocampus). Age and gender were explored as influential  
200 covariates.

201 Data were captured using REDCap (9). The analyses for this project were performed using R (base  
202 and lme4 packages).(56, 57)

203



204 **Results**

205

206 ***Participants***

207 A total of 112 individuals were assessed for study eligibility from October 2019 through October 2021.

208 Reasons for exclusion are presented in Figure 1. Enrollment was expanded to 62 in August '21 to increase

209 representation of men and individuals identifying with a racial or ethnic minoritized community. Genotyping of

210 one individual failed, and this person was excluded from analysis. One person withdrew during exercise due

211 to an adverse event, one refused post-exercise MRI, and post-exercise blood collection failed on 2

212 participants, leaving sample sizes of 59 and 58 for primary and secondary outcomes, respectively.

213 Self-reported racial and Hispanic/Latino ethnic identity of enrollees was recorded in compliance with

214 National Institute of Health guidance, and approximately reflected the diversity of older adults in the Kansas

215 City region in the 2020 census. We also identified rural residence (58) and calculated the Area Deprivation

216 Index, a geospatial socio-economic disadvantage metric, related to health and dementia risk, to enrich

217 characterization of our participants.(59) We found no evidence of significant differences between carriers and

218 non-carriers in standard demographic measures ( $p \geq 0.3$ , Table 1).

219

220

Table 1. Demographics

| Characteristic                                | Overall,<br>N = 61 <sup>1</sup> | Non-carrier,<br>N = 38 <sup>1</sup> | APOE4 Carrier,<br>N = 23 <sup>1</sup> | p-value <sup>2</sup> |
|-----------------------------------------------|---------------------------------|-------------------------------------|---------------------------------------|----------------------|
| <b>Age</b>                                    | 72.8 (5.2)                      | 73.3 (5.2)                          | 72.1 (5.1)                            | 0.4                  |
| <b>Gender</b>                                 |                                 |                                     |                                       | 0.3                  |
| Men                                           | 20 (33%)                        | 10 (26%)                            | 10 (43%)                              |                      |
| Women                                         | 41 (67%)                        | 28 (74%)                            | 13 (57%)                              |                      |
| Non-Binary                                    | 0 (0%)                          | 0 (0%)                              | 0 (0%)                                |                      |
| <b>Race</b>                                   |                                 |                                     |                                       | >0.9                 |
| Asian                                         | 1 (1.6%)                        | 1 (2.6%)                            | 0 (0%)                                |                      |
| Black or African American                     | 6 (9.8%)                        | 4 (11%)                             | 2 (8.7%)                              |                      |
| White                                         | 54 (89%)                        | 33 (87%)                            | 21 (91%)                              |                      |
| <b>Ethnicity</b>                              |                                 |                                     |                                       | >0.9                 |
| Non-Hispanic or Latino                        | 59 (97%)                        | 37 (97%)                            | 22 (96%)                              |                      |
| Hispanic or Latino                            | 2 (3.3%)                        | 1 (2.6%)                            | 1 (4.3%)                              |                      |
| <b>Rural Residence</b>                        |                                 |                                     |                                       | >0.9                 |
| Sub/Urban Resident                            | 58 (97%)                        | 37 (97%)                            | 21 (95%)                              |                      |
| Rural Resident                                | 2 (3.3%)                        | 1 (2.6%)                            | 1 (4.5%)                              |                      |
| <b>Formal Education (yrs)</b>                 | 18.8 (2.8)                      | 18.8 (2.4)                          | 18.7 (3.3)                            | 0.9                  |
| <b>Area Deprivation Index</b><br>(National %) | 35.0 (2.0-96.0)                 | 34.5 (7.0-91.0)                     | 36.0 (2.0-96.0)                       | 0.8                  |

<sup>1</sup>Mean (SD); n (%); Median (Minimum-Maximum)

<sup>2</sup>Welch Two Sample t-test; Fisher's exact test

225

226 **Primary Outcome**

227 In our pre-specified analysis, we found no evidence of an effect of APOE4 carriage on cortical gray  
228 matter post-exercise CBF AUC, see Table 2 ( $t = 1.4$ ,  $p=0.16$ , 95%CI [-31.9 184.3]). Figure 2 shows CBF AUC  
229 for our pre-specified whole gray matter cortical CBF AUC and cerebellar reference region.

230

Table 2. Pre-specified primary and secondary outcomes

|                                  | Overall, N = 59 | Non-carrier, N = 38 <sup>1</sup> | APOE4 Carrier, N = 21 |
|----------------------------------|-----------------|----------------------------------|-----------------------|
| <b>Whole Gray Matter CBF AUC</b> | 1,486.6 (188.5) | 1,513.7 (174.4)                  | 1,437.5 (206.9)       |
| <b>Change in BDNF (pg/mL)</b>    | 110.1 (616.5)   | 207.8 (705.9)                    | -65.6 (362.9)         |
| <b>Change in IGF1 (pg/mL)</b>    | 4.5 (26.0)      | 5.7 (27.8)                       | 2.3 (22.8)            |
| <b>Change in VEGF (pg/mL)</b>    | 0.9 (10.9)      | 1.8 (11.1)                       | -1.0 (10.6)           |

Area under cerebral blood flow curve (CBF AUC). Pre to post-exercise change in brain derived neurotrophic factor (BDNF), insulin-like Growth Factor 1 (IGF1) and vascular endothelial growth factor (VEGF). All values are presented as mean (sd).

231

232 Figure 2 caption

233 Figure 2. Cerebral Blood Flow Area Under the Curve Does not Differ After Exercise Based on APOE4

234 Carriage

235

236 Figure 2 legend

237 Total cerebral blood flow following exercise is plotted for both the primary region of interest, cortical gray  
238 matter, and the cerebellar gray matter reference region. Black bars denote APOE4 carriers. Gray bars denote  
239 APOE4 non-carriers. Error bars are standard deviation.

240

241 **Secondary Outcomes**

242 Change in our blood-based markers from pre- to post-exercise, were not significant in any of the  
243 neurotrophic factors we explored (Table 2). Pre- to Post-exercise change in VEGF and IGF1 change did not  
244 approach significance ( $p>0.34$ ). Change in BDNF post-exercise was increased but did not reach significance  
245 ( $p=0.06$ ).

246

247 **Exploratory Analyses**

248 In our exploratory analyses, we first modeled a 3-way interaction of gray matter region (whole cortical,  
249 hippocampus, cerebellum), CBF AUC from baseline to post-exercise, and APOE4 carriage. Gender, but not  
250 age, was included as a covariate based on preliminary modelling of influential demographic factors. Including  
251 the 3-way interaction significantly improved the model fit compared to the reduced model without the  
252 interaction of region, APOE4 carriage and CBF AUC ( $X^2 = 21.1$ ,  $p = 0.004$ ). The presence of the significant 3-  
253 way interaction allowed us to perform post-hoc modeling on each region separately. We found that APOE4  
254 carriers had higher post-exercise CBF AUC in the hippocampus ( $X^2 = 4.5$ ,  $p = 0.03$ ), but not in the whole  
255 cortical gray matter ( $X^2 = 0.75$ ,  $p = 0.39$ ), and not the cerebellum ( $X^2 = 0.62$ ,  $p = 0.43$ ; S1 Supplemental  
256 Figure). Across all regions, women had significantly higher CBF ( $p<0.001$ ).

257

258 **Adherence and Safety**

259 There was 1 adverse event, nausea, during exercise which resulted in termination of the visit and  
260 withdrawal of the participant (APOE4 carrier). One person elected not to complete the MRI post exercise  
261 (APOE4 carrier). All remaining participants were able to exercise within their identified target heart rate zone.  
262 There were no differences in the total power output in Watts, of the exercisers ( $p=0.38$ ). APOE4 carriers had  
263 a mean power output of 741 (s.d. 304) and non-carriers had a mean power output of 664 (s.d. 347).

264

265

## 266 Discussion

267 This is the first study to specifically assess cerebral blood flow (CBF) responses to exercise,  
268 comparing those with and without a common genetic Alzheimer's risk factor, APOE4. Our pre-specified  
269 analyses found no differences in whole brain CBF post-exercise between APOE4 carriers and non-carriers.  
270 Likewise, changes in circulating neurotrophic factor levels immediately post-exercise were not different  
271 between carrier and noncarriers. The exploratory experimental approach of this study was designed to  
272 investigate the acute physiologic response to exercise, and not investigating exercise as a therapeutic  
273 intervention. As such, we explored the regional-specific changes in CBF in the hippocampus, given its  
274 differential benefit to exercise interventions and salience in cognitive change and dementia. In our exploratory  
275 analyses we found that APOE4 carriers display a greater increase in hippocampal region CBF in the acute  
276 response following exercise that were not present in whole brain or the cerebellar region, the latter serving as  
277 a reference region. These findings extend prior work showing similar hyperemic response in the  
278 hippocampus,(60) and provide initial evidence that APOE4 carriers demonstrate greater hyperemia within the  
279 hippocampus than their non-carrier peers immediately after an acute exercise bout. Further, the  
280 heterogeneity of immediate post-exercise neurotrophin response across all older adults in the present study  
281 identify an area of future exploration for future research investigating acute physiologic responses to aerobic  
282 exercise. These findings provide an individualized framework for acute physiologic responses to an acute  
283 bout of aerobic exercise. Our results support a precision-medicine approach for the characterization and  
284 targeting of physiologic substrates with exercise interventions to benefit brain health.

285

## 286 ***Effect of APOE4 Genotype on Acute Exercise-induced Cerebral Blood Flow***

287 Prior reports of hippocampal blood flow change in acute response to exercise have been inconsistent,  
288 with both increases and decreases reported (60-63) Our findings are consistent with prior work demonstrating  
289 chronically increased cerebral blood flow in the hippocampi of young adults following an exercise  
290 intervention.(64)and further highlight the APOE4 genotype-by-hippocampal interactive effect that should be  
291 considered in aging populations. Though the present study is one of the first investigations of the immediate  
292 acute effects of aerobic exercise in older adults, Alfini et al reported that short periods (i.e. 10 days) of  
293 sedentary behavior have a powerful reversal effect for reducing hippocampal CBF in highly active older  
294 adults.(65) The present results build up on these previous findings, together suggesting that hippocampal  
295 brain structures in older adults of this known risk allele are highly sensitive to changes in physical activity  
296 behaviors. Importantly, our findings provide a foundation for an individualized framework and brain region-  
297 specific analyses when studying the effects of exercise on cerebral blood flow. This may be a critical next  
298 step for linking cognitive maintenance to exercise effects, as prior work has failed to demonstrate a direct  
299 relationship between proxies of cerebral blood flow (transcranial Doppler) and cognition.(66)

300

## 301 ***Neurotrophin Factors Show No Change Immediately Following Acute Aerobic Exercise in Older*** 302 ***Adults***

303 In contrast to previous reports in neurotypical young adults, we observed no exercise-induced change  
304 in blood neurotrophin concentration in older adults in the present study, regardless of APOE4 carrier status.  
305 This finding was surprising given that previous studies in younger adults report robust increases in these  
306 neurotrophic factors, IGF1, VEGF, and BDNF among others.(20, 67-70) Exercise-induced increases in  
307 neurotrophic factors have been associated with neurogenesis and angiogenesis in rodent models and are  
308 thought to explain brain health and cognitive benefits of exercise interventions.(64, 71, 72) However, in  
309 almost all cases, CBF and neurotrophins in human studies have been measured following an extended  
310 period of rest, without a challenging stimulus. Given that benefits would necessarily result from discrete,  
311 repeated exposures to an exercise intervention, measuring during inactivity potentially obscures important  
312 dynamic adaptations or capacities. Indeed, a challenging stimulus such as acute bout of aerobic exercise  
313 may be necessary to sufficiently study local and systemic effects on the brain.(73, 74) . Methodological

314 differences may also contribute to these differences. We chose to focus on platelet poor plasma, as  
315 neurotrophins are released from platelets following freeze-thaw cycles.(75) We believed this approach would  
316 give a more accurate representation on circulating, rather than stored, biomarker concentrations. Future work  
317 should consider that these biomarkers may have a delayed increase after exercise stimulus onset. Because  
318 APOE4 has been shown to influence release of BDNF and interact with VEGF, additional investigation is  
319 warranted.(76-78) Further, given there was no increase in neurotrophins between groups immediately  
320 following exercise, the greater change in hippocampal CBF immediately following exercise in older adult  
321 APOE4 carriers thus appears to be mechanistically driven by different factors than that observed in younger  
322 adults. Future investigations may test whether other physiologic factors (e.g. blood lactate) that may drive  
323 cerebral perfusion responses, and may further explain the specificity of such responses in hippocampal brain  
324 regions.

325

## 326 **Limitations**

327 This study has several limitations. First, we did not identify CBF change in our pre-specified primary  
328 outcome. At the time of inception, National Institute of Health guidance classified all exercise experimental  
329 designs as clinical trials. Following CONSORT guidance, we declared a priori outcomes of interest despite  
330 relative uncertainty in how to quantify our time-course data. Thus, we feel justified in presenting and  
331 emphasizing our alternative analysis results. But the effect size of APOE4-related differences in our pre-  
332 specified primary outcome was insufficient to reject the null hypothesis. Second, our groups are unbalanced.  
333 Though we made significant efforts to over-represent APOE4 carriers(49), our final sample approximates the  
334 distribution of the E4 in the US population. Given the advantage of high spatial resolution and sensitivity to  
335 cerebral perfusion changes, the present study utilized a MR imaging method to quantify cerebral blood flow.  
336 This method limits our ability to interpret CBF changes during the exercise bout that may have influenced  
337 immediate post-exercise CBF changes. As we have previously reported, the recovery time course for CBF  
338 appears to be relatively independent of blood pressure changes.(49) However, future work should emphasize  
339 accurate measurement of blood pressure, respiratory rate, and heart rate during the exercise bout to test the  
340 effect of blood pressure changes on CBF.

341

342

343 **Conclusion**

344 We conducted the first comparison of the effect of a common Alzheimer’s risk gene, APOE4, on post-  
345 exercise cerebral blood flow and common neurotrophic changes following moderate intensity aerobic  
346 exercise. Our method of characterizing cerebral blood flow recovery may provide new avenues for MRI  
347 quantification of perfusion change. By using this method, we extended prior work showing that the  
348 hippocampus experiences great post-exercise blood flow increases in older adult APOE4 carriers.  
349 Investigation of the key mechanisms by which aerobic exercise supports cognition and brain health will  
350 continue to have important implications for future work by optimizing prescribed exercise interventions and  
351 specifying appropriate outcomes of interest.

352

353



354 **References**

- 355 1. Kivipelto M, Helkala EL, Laakso MP, Hanninen T, Hallikainen M, Alhainen K, et al. Midlife vascular  
356 risk factors and Alzheimer's disease in later life: longitudinal, population based study. *Bmj*.  
357 2001;322(7300):1447-51.
- 358 2. Willer CJ, Sanna S, Jackson AU, Scuteri A, Bonnycastle LL, Clarke R, et al. Newly identified loci that  
359 influence lipid concentrations and risk of coronary artery disease. *Nature genetics*. 2008;40(2):161-9.
- 360 3. Khan TA, Shah T, Prieto D, Zhang W, Price J, Fowkes GR, et al. Apolipoprotein E genotype,  
361 cardiovascular biomarkers and risk of stroke: systematic review and meta-analysis of 14,015 stroke  
362 cases and pooled analysis of primary biomarker data from up to 60,883 individuals. *International  
363 journal of epidemiology*. 2013;42(2):475-92.
- 364 4. Bertram L, McQueen MB, Mullin K, Blacker D, Tanzi RE. Systematic meta-analyses of Alzheimer  
365 disease genetic association studies: the AlzGene database. *Nature genetics*. 2007;39(1):17-23.
- 366 5. Tarumi T, Zhang R. Cerebral hemodynamics of the aging brain: risk of Alzheimer disease and benefit  
367 of aerobic exercise. *Frontiers in physiology*. 2014;5:6.
- 368 6. Imtiaz B, Tolppanen AM, Kivipelto M, Soininen H. Future directions in Alzheimer's disease from risk  
369 factors to prevention. *Biochemical pharmacology*. 2014;88(4):661-70.
- 370 7. Haskell WL, Lee IM, Pate RR, Powell KE, Blair SN, Franklin BA, et al. Physical activity and public  
371 health: updated recommendation for adults from the American College of Sports Medicine and the  
372 American Heart Association. *Circulation*. 2007;116(9):1081-93.
- 373 8. Kane RL, Butler M, Fink HA, Brasure M, Davila H, Desai P, et al. Interventions to Prevent Age-  
374 Related Cognitive Decline, Mild Cognitive Impairment, and Clinical Alzheimer's-Type Dementia.  
375 AHRQ Comparative Effectiveness Reviews. Rockville (MD)2017.
- 376 9. Kramer AF, Hahn S, Cohen NJ, Banich MT, McAuley E, Harrison CR, et al. Ageing, fitness and  
377 neurocognitive function. *Nature*. 1999;400(6743):418-9.
- 378 10. Colcombe SJ, Kramer AF, Erickson KI, Scalf P, McAuley E, Cohen NJ, et al. Cardiovascular fitness,  
379 cortical plasticity, and aging. *Proceedings of the National Academy of Sciences*. 2004;101(9):3316-21.
- 380 11. Vidoni ED, Honea RA, Billinger SA, Swerdlow RH, Burns JM. Cardiorespiratory fitness is associated  
381 with atrophy in Alzheimer's and aging over 2 years. *Neurobiology of aging*. 2012;33(8):1624-32.

- 382 12. Vidoni ED, Johnson DK, Morris JK, Van Sciver A, Greer CS, Billinger SA, et al. Dose-Response of  
383 Aerobic Exercise on Cognition: A Community-Based, Pilot Randomized Controlled Trial. *PloS one*.  
384 2015;10(7):e0131647.
- 385 13. Freudenberger P, Petrovic K, Sen A, Toglhofer AM, Fixa A, Hofer E, et al. Fitness and cognition in the  
386 elderly: The Austrian Stroke Prevention Study. *Neurology*. 2016;86(5):418-24.
- 387 14. Burns JM, Cronk BB, Anderson HS, Donnelly JE, Thomas GP, Harsha A, et al. Cardiorespiratory  
388 fitness and brain atrophy in early Alzheimer disease. *Neurology*. 2008;71(3):210-6.
- 389 15. Williams VJ, Hayes JP, Forman DE, Salat DH, Sperling RA, Verfaellie M, et al. Cardiorespiratory  
390 fitness is differentially associated with cortical thickness in young and older adults. *Neuroimage*.  
391 2017;146:1084-92.
- 392 16. Tian Q, Studenski SA, Resnick SM, Davatzikos C, Ferrucci L. Midlife and Late-Life Cardiorespiratory  
393 Fitness and Brain Volume Changes in Late Adulthood: Results From the Baltimore Longitudinal Study  
394 of Aging. *J Gerontol A Biol Sci Med Sci*. 2016;71(1):124-30.
- 395 17. Boots EA, Schultz SA, Oh JM, Larson J, Edwards D, Cook D, et al. Cardiorespiratory fitness is  
396 associated with brain structure, cognition, and mood in a middle-aged cohort at risk for Alzheimer's  
397 disease. *Brain Imaging Behav*. 2015;9(3):639-49.
- 398 18. Dougherty RJ, Ellingson LD, Schultz SA, Boots EA, Meyer JD, Lindheimer JB, et al. Meeting physical  
399 activity recommendations may be protective against temporal lobe atrophy in older adults at risk for  
400 Alzheimer's disease. *Alzheimers Dement (Amst)*. 2016;4:14-7.
- 401 19. Dustman RE, Emmerson RY, Ruhling RO, Shearer DE, Steinhaus LA, Johnson SC, et al. Age and  
402 fitness effects on EEG, ERPs, visual sensitivity, and cognition. *NeurobiolAging*. 1990;11(3):193-200.
- 403 20. Maass A, Duzel S, Brigadski T, Goerke M, Becke A, Sobieray U, et al. Relationships of peripheral  
404 IGF-1, VEGF and BDNF levels to exercise-related changes in memory, hippocampal perfusion and  
405 volumes in older adults. *Neuroimage*. 2016;131:142-54.
- 406 21. Erickson KI, Voss MW, Prakash RS, Basak C, Szabo A, Chaddock L, et al. Exercise training  
407 increases size of hippocampus and improves memory. *Proceedings of the National Academy of*  
408 *Sciences of the United States of America*. 2011;108(7):3017-22.

- 409 22. Tyndall AV, Davenport MH, Wilson BJ, Burek GM, Arsenault-Lapierre G, Haley E, et al. The brain-in-  
410 motion study: effect of a 6-month aerobic exercise intervention on cerebrovascular regulation and  
411 cognitive function in older adults. *BMC geriatrics*. 2013;13:21.
- 412 23. Voss MW, Weng TB, Burzynska AZ, Wong CN, Cooke GE, Clark R, et al. Fitness, but not physical  
413 activity, is related to functional integrity of brain networks associated with aging. *Neuroimage*.  
414 2016;131:113-25.
- 415 24. Billinger SA, Craig JC, Kwapiszeski SJ, Sisante JV, Vidoni ED, Maletsky R, et al. Dynamics of middle  
416 cerebral artery blood flow velocity during moderate-intensity exercise. *Journal of applied physiology*.  
417 2017;122(5):1125-33.
- 418 25. Cotman CW, Berchtold NC. Exercise: a behavioral intervention to enhance brain health and plasticity.  
419 *Trends in neurosciences*. 2002;25(6):295-301.
- 420 26. Soto I, Graham LC, Richter HJ, Simeone SN, Radell JE, Grabowska W, et al. APOE Stabilization by  
421 Exercise Prevents Aging Neurovascular Dysfunction and Complement Induction. *PLoS biology*.  
422 2015;13(10):e1002279.
- 423 27. Bell RD, Winkler EA, Singh I, Sagare AP, Deane R, Wu Z, et al. Apolipoprotein E controls  
424 cerebrovascular integrity via cyclophilin A. *Nature*. 2012;485(7399):512-6.
- 425 28. Hasel P, Liddel SA. Isoform-dependent APOE secretion modulates neuroinflammation. *Nat Rev*  
426 *Neurol*. 2021;17(5):265-6.
- 427 29. Kloske CM, Wilcock DM. The Important Interface Between Apolipoprotein E and Neuroinflammation in  
428 Alzheimer's Disease. *Front Immunol*. 2020;11:754.
- 429 30. Tai LM, Thomas R, Marottoli FM, Koster KP, Kanekiyo T, Morris AW, et al. The role of APOE in  
430 cerebrovascular dysfunction. *Acta Neuropathol*. 2016;131(5):709-23.
- 431 31. Thambisetty M, Beason-Held L, An Y, Kraut MA, Resnick SM. APOE epsilon4 genotype and  
432 longitudinal changes in cerebral blood flow in normal aging. *Archives of neurology*. 2010;67(1):93-8.
- 433 32. Kim SM, Kim MJ, Rhee HY, Ryu CW, Kim EJ, Petersen ET, et al. Regional cerebral perfusion in  
434 patients with Alzheimer's disease and mild cognitive impairment: effect of APOE epsilon4 allele.  
435 *Neuroradiology*. 2013;55(1):25-34.

- 436 33. Brown WR, Thore CR. Review: cerebral microvascular pathology in ageing and neurodegeneration.  
437 Neuropathology and applied neurobiology. 2011;37(1):56-74.
- 438 34. Zlokovic BV. Neurovascular pathways to neurodegeneration in Alzheimer's disease and other  
439 disorders. Nature reviews Neuroscience. 2011;12(12):723-38.
- 440 35. Bangen KJ, Restom K, Liu TT, Wierenga CE, Jak AJ, Salmon DP, et al. Assessment of Alzheimer's  
441 disease risk with functional magnetic resonance imaging: an arterial spin labeling study. J Alzheimers  
442 Dis. 2012;31 Suppl 3:S59-74.
- 443 36. Tosun D, Schuff N, Jagust W, Weiner MW, Alzheimer's Disease Neuroimaging I. Discriminative  
444 Power of Arterial Spin Labeling Magnetic Resonance Imaging and 18F-Fluorodeoxyglucose Positron  
445 Emission Tomography Changes for Amyloid-beta-Positive Subjects in the Alzheimer's Disease  
446 Continuum. Neurodegener Dis. 2016;16(1-2):87-94.
- 447 37. Johnson NA, Jahng GH, Weiner MW, Miller BL, Chui HC, Jagust WJ, et al. Pattern of cerebral  
448 hypoperfusion in Alzheimer disease and mild cognitive impairment measured with arterial spin-  
449 labeling MR imaging: initial experience. Radiology. 2005;234(3):851-9.
- 450 38. Xie L, Dolui S, Das SR, Stockbower GE, Daffner M, Rao H, et al. A brain stress test: Cerebral  
451 perfusion during memory encoding in mild cognitive impairment. Neuroimage Clin. 2016;11:388-97.
- 452 39. Jefferson AL, Liu D, Gupta DK, Pechman KR, Watchmaker JM, Gordon EA, et al. Lower cardiac index  
453 levels relate to lower cerebral blood flow in older adults. Neurology. 2017;89(23):2327-34.
- 454 40. van Laar PJ, van der Graaf Y, Mali WP, van der Grond J, Hendrikse J, Group SS. Effect of  
455 cerebrovascular risk factors on regional cerebral blood flow. Radiology. 2008;246(1):198-204.
- 456 41. Farkas E, Luiten PG. Cerebral microvascular pathology in aging and Alzheimer's disease. Prog  
457 Neurobiol. 2001;64(6):575-611.
- 458 42. Roher AE, Esh C, Kokjohn TA, Kalback W, Luehrs DC, Seward JD, et al. Circle of willis  
459 atherosclerosis is a risk factor for sporadic Alzheimer's disease. Arterioscler Thromb Vasc Biol.  
460 2003;23(11):2055-62.
- 461 43. Alata W, Ye Y, St-Amour I, Vandal M, Calon F. Human apolipoprotein E varepsilon4 expression  
462 impairs cerebral vascularization and blood-brain barrier function in mice. Journal of cerebral blood

- 463 flow and metabolism : official journal of the International Society of Cerebral Blood Flow and  
464 Metabolism. 2015;35(1):86-94.
- 465 44. Tarumi T, Zhang R. Cerebral blood flow in normal aging adults: cardiovascular determinants, clinical  
466 implications, and aerobic fitness. *J Neurochem*. 2018;144(5):595-608.
- 467 45. Iadecola C. Neurovascular regulation in the normal brain and in Alzheimer's disease. *Nat Rev*  
468 *Neurosci*. 2004;5(5):347-60.
- 469 46. Zlokovic BV, Deane R, Sallstrom J, Chow N, Miano JM. Neurovascular pathways and Alzheimer  
470 amyloid beta-peptide. *Brain Pathol*. 2005;15(1):78-83.
- 471 47. Toth P, Tarantini S, Ashpole NM, Tucsek Z, Milne GL, Valcarcel-Ares NM, et al. IGF-1 deficiency  
472 impairs neurovascular coupling in mice: implications for cerebrovascular aging. *Aging Cell*.  
473 2015;14(6):1034-44.
- 474 48. Zlatar ZZ, Bischoff-Grethe A, Hays CC, Liu TT, Meloy MJ, Rissman RA, et al. Higher Brain Perfusion  
475 May Not Support Memory Functions in Cognitively Normal Carriers of the ApoE epsilon4 Allele  
476 Compared to Non-Carriers. *Frontiers in aging neuroscience*. 2016;8:151.
- 477 49. White D, John CS, Kucera A, Truver B, Lepping RJ, Kueck PJ, et al. A methodology for an acute  
478 exercise clinical trial called dementia risk and dynamic response to exercise. *Sci Rep*.  
479 2021;11(1):12776.
- 480 50. Kilroy E, Apostolova L, Liu C, Yan L, Ringman J, Wang DJ. Reliability of 2D and 3D Pseudo-  
481 Continuous Arterial Spin Labeling Perfusion MRI in Elderly Populations—Comparison with 15O-water  
482 PET. *Journal of magnetic resonance imaging: JMRI*. 2014;39(4):931.
- 483 51. Wang Y, Moeller S, Li X, Vu AT, Krasileva K, Ugurbil K, et al. Simultaneous multi-slice Turbo-FLASH  
484 imaging with CAIPIRINHA for whole brain distortion-free pseudo-continuous arterial spin labeling at 3  
485 and 7 T. *Neuroimage*. 2015;113:279-88.
- 486 52. Wang DJ, Alger JR, Qiao JX, Gunther M, Pope WB, Saver JL, et al. Multi-delay multi-parametric  
487 arterial spin-labeled perfusion MRI in acute ischemic stroke - Comparison with dynamic susceptibility  
488 contrast enhanced perfusion imaging. *Neuroimage Clin*. 2013;3:1-7.

- 489 53. Yan L, Wang S, Zhuo Y, Wolf RL, Stiefel MF, An J, et al. Unenhanced dynamic MR angiography: high  
490 spatial and temporal resolution by using true FISP-based spin tagging with alternating radiofrequency.  
491 Radiology. 2010;256(1):270-9.
- 492 54. Dahnke R, Yotter RA, Gaser C. Cortical thickness and central surface estimation. Neuroimage.  
493 2013;65:336-48.
- 494 55. Wang J, Alsop DC, Song HK, Maldjian JA, Tang K, Salvucci AE, et al. Arterial transit time imaging  
495 with flow encoding arterial spin tagging (FEAST). Magn Reson Med. 2003;50(3):599-607.
- 496 56. Team RC. R: A Language and Environment for Statistical Computing. Vienna, Austria: R Foundation  
497 for Statistical Computing; 2021. R Foundation for Statistical Computing. ISBN 3-900051-07-0. [http://](http://www.R-project.org)  
498 [www.R-project.org](http://www.R-project.org); 2021.
- 499 57. Bates D, Machler M, Bolker B, Walker S. Fitting Linear Mixed-Effects Models Using lme4. Journal of  
500 Statistical Software. 2021;67(1).
- 501 58. Administration HRS. Defining Rural Population [Feb. 3, 2022]. Available from:  
502 <https://www.hrsa.gov/rural-health/about-us/definition/index.html>.
- 503 59. Zuelsdorff M, Larson JL, Hunt JFV, Kim AJ, Kosciak RL, Buckingham WR, et al. The Area Deprivation  
504 Index: A novel tool for harmonizable risk assessment in Alzheimer's disease research. Alzheimers  
505 Dement (N Y). 2020;6(1):e12039.
- 506 60. Steventon JJ, Foster C, Furby H, Helme D, Wise RG, Murphy K. Hippocampal Blood Flow Is  
507 Increased After 20 min of Moderate-Intensity Exercise. Cereb Cortex. 2020;30(2):525-33.
- 508 61. MacIntosh BJ, Crane DE, Sage MD, Rajab AS, Donahue MJ, McIlroy WE, et al. Impact of a single  
509 bout of aerobic exercise on regional brain perfusion and activation responses in healthy young adults.  
510 PloS one. 2014;9(1):e85163.
- 511 62. Witte E, Liu Y, Ward JL, Kempf KS, Whitaker A, Vidoni ED, et al. Exercise intensity and middle  
512 cerebral artery dynamics in humans. Respir Physiol Neurobiol. 2019;262:32-9.
- 513 63. Whitaker AA, Aaron SE, Kaufman CS, Kurtz BK, Bai SX, Vidoni ED, et al. Cerebrovascular response  
514 to an acute bout of low-volume high-intensity interval exercise and recovery in young healthy adults.  
515 Journal of applied physiology. 2022;132(1):236-46.

- 516 64. Pereira AC, Huddleston DE, Brickman AM, Sosunov AA, Hen R, McKhann GM, et al. An in vivo  
517 correlate of exercise-induced neurogenesis in the adult dentate gyrus. *Proceedings of the National*  
518 *Academy of Sciences of the United States of America*. 2007;104(13):5638-43.
- 519 65. Alfini AJ, Weiss LR, Leitner BP, Smith TJ, Hagberg JM, Smith JC. Hippocampal and Cerebral Blood  
520 Flow after Exercise Cessation in Master Athletes. *Frontiers in aging neuroscience*. 2016;8:184.
- 521 66. Ogoh S. Relationship between cognitive function and regulation of cerebral blood flow. *J Physiol Sci*.  
522 2017;67(3):345-51.
- 523 67. Ferris LT, Williams JS, Shen CL. The effect of acute exercise on serum brain-derived neurotrophic  
524 factor levels and cognitive function. *Medicine and science in sports and exercise*. 2007;39(4):728-34.
- 525 68. Hashimoto T, Tsukamoto H, Takenaka S, Olesen ND, Petersen LG, Sorensen H, et al. Maintained  
526 exercise-enhanced brain executive function related to cerebral lactate metabolism in men. *FASEB*  
527 *journal : official publication of the Federation of American Societies for Experimental Biology*. 2017.
- 528 69. Rasmussen P, Brassard P, Adser H, Pedersen MV, Leick L, Hart E, et al. Evidence for a release of  
529 brain-derived neurotrophic factor from the brain during exercise. *Experimental physiology*.  
530 2009;94(10):1062-9.
- 531 70. Russo-Neustadt AA, Beard RC, Huang YM, Cotman CW. Physical activity and antidepressant  
532 treatment potentiate the expression of specific brain-derived neurotrophic factor transcripts in the rat  
533 hippocampus. *Neuroscience*. 2000;101(2):305-12.
- 534 71. van Praag H, Kempermann G, Gage FH. Running increases cell proliferation and neurogenesis in the  
535 adult mouse dentate gyrus. *Nat Neurosci*. 1999;2(3):266-70.
- 536 72. Intlekofer KA, Cotman CW. Exercise counteracts declining hippocampal function in aging and  
537 Alzheimer's disease. *Neurobiol Dis*. 2013;57:47-55.
- 538 73. Braz ID, Fisher JP. The impact of age on cerebral perfusion, oxygenation and metabolism during  
539 exercise in humans. *The Journal of physiology*. 2016;594(16):4471-83.
- 540 74. Brugniaux JV, Marley CJ, Hodson DA, New KJ, Bailey DM. Acute exercise stress reveals  
541 cerebrovascular benefits associated with moderate gains in cardiorespiratory fitness. *Journal of*  
542 *cerebral blood flow and metabolism : official journal of the International Society of Cerebral Blood*  
543 *Flow and Metabolism*. 2014;34(12):1873-6.



- 544 75. Wessels JM, Agarwal RK, Somani A, Verschoor CP, Agarwal SK, Foster WG. Factors affecting  
545 stability of plasma brain-derived neurotrophic factor. *Sci Rep.* 2020;10(1):20232.
- 546 76. Antes R, Salomon-Zimri S, Beck SC, Garcia Garrido M, Livnat T, Maharshak I, et al. VEGF Mediates  
547 ApoE4-Induced Neovascularization and Synaptic Pathology in the Choroid and Retina. *Curr*  
548 *Alzheimer Res.* 2015;12(4):323-34.
- 549 77. Salomon-Zimri S, Glat MJ, Barhum Y, Luz I, Boehm-Cagan A, Liraz O, et al. Reversal of ApoE4-  
550 Driven Brain Pathology by Vascular Endothelial Growth Factor Treatment. *J Alzheimers Dis.*  
551 2016;53(4):1443-58.
- 552 78. Sen A, Nelson TJ, Alkon DL. ApoE isoforms differentially regulates cleavage and secretion of BDNF.  
553 *Molecular brain.* 2017;10(1):19.
- 554
- 555



556 Supplemental Captions

557

558 S1 Figure. Regional Blood Flow Area Under Curve Pre- and Post-Exercise

559

560 The figure shows total cerebral blood flow (mL/100g tissue) in three regions of interest. Pre- and post-  
561 exercise time frames are equivalent, ~12 minutes of arterial spin labeling data collection. The hippocampus  
562 demonstrated an increase in post-exercise cerebral blood flow over pre-exercise in APOE4 carriers only.  
563 Light gray bars denote APOE4 non-carriers. Dark gray / black bars denote APOE4 carriers. Error bars are  
564 standard deviation.

565

566

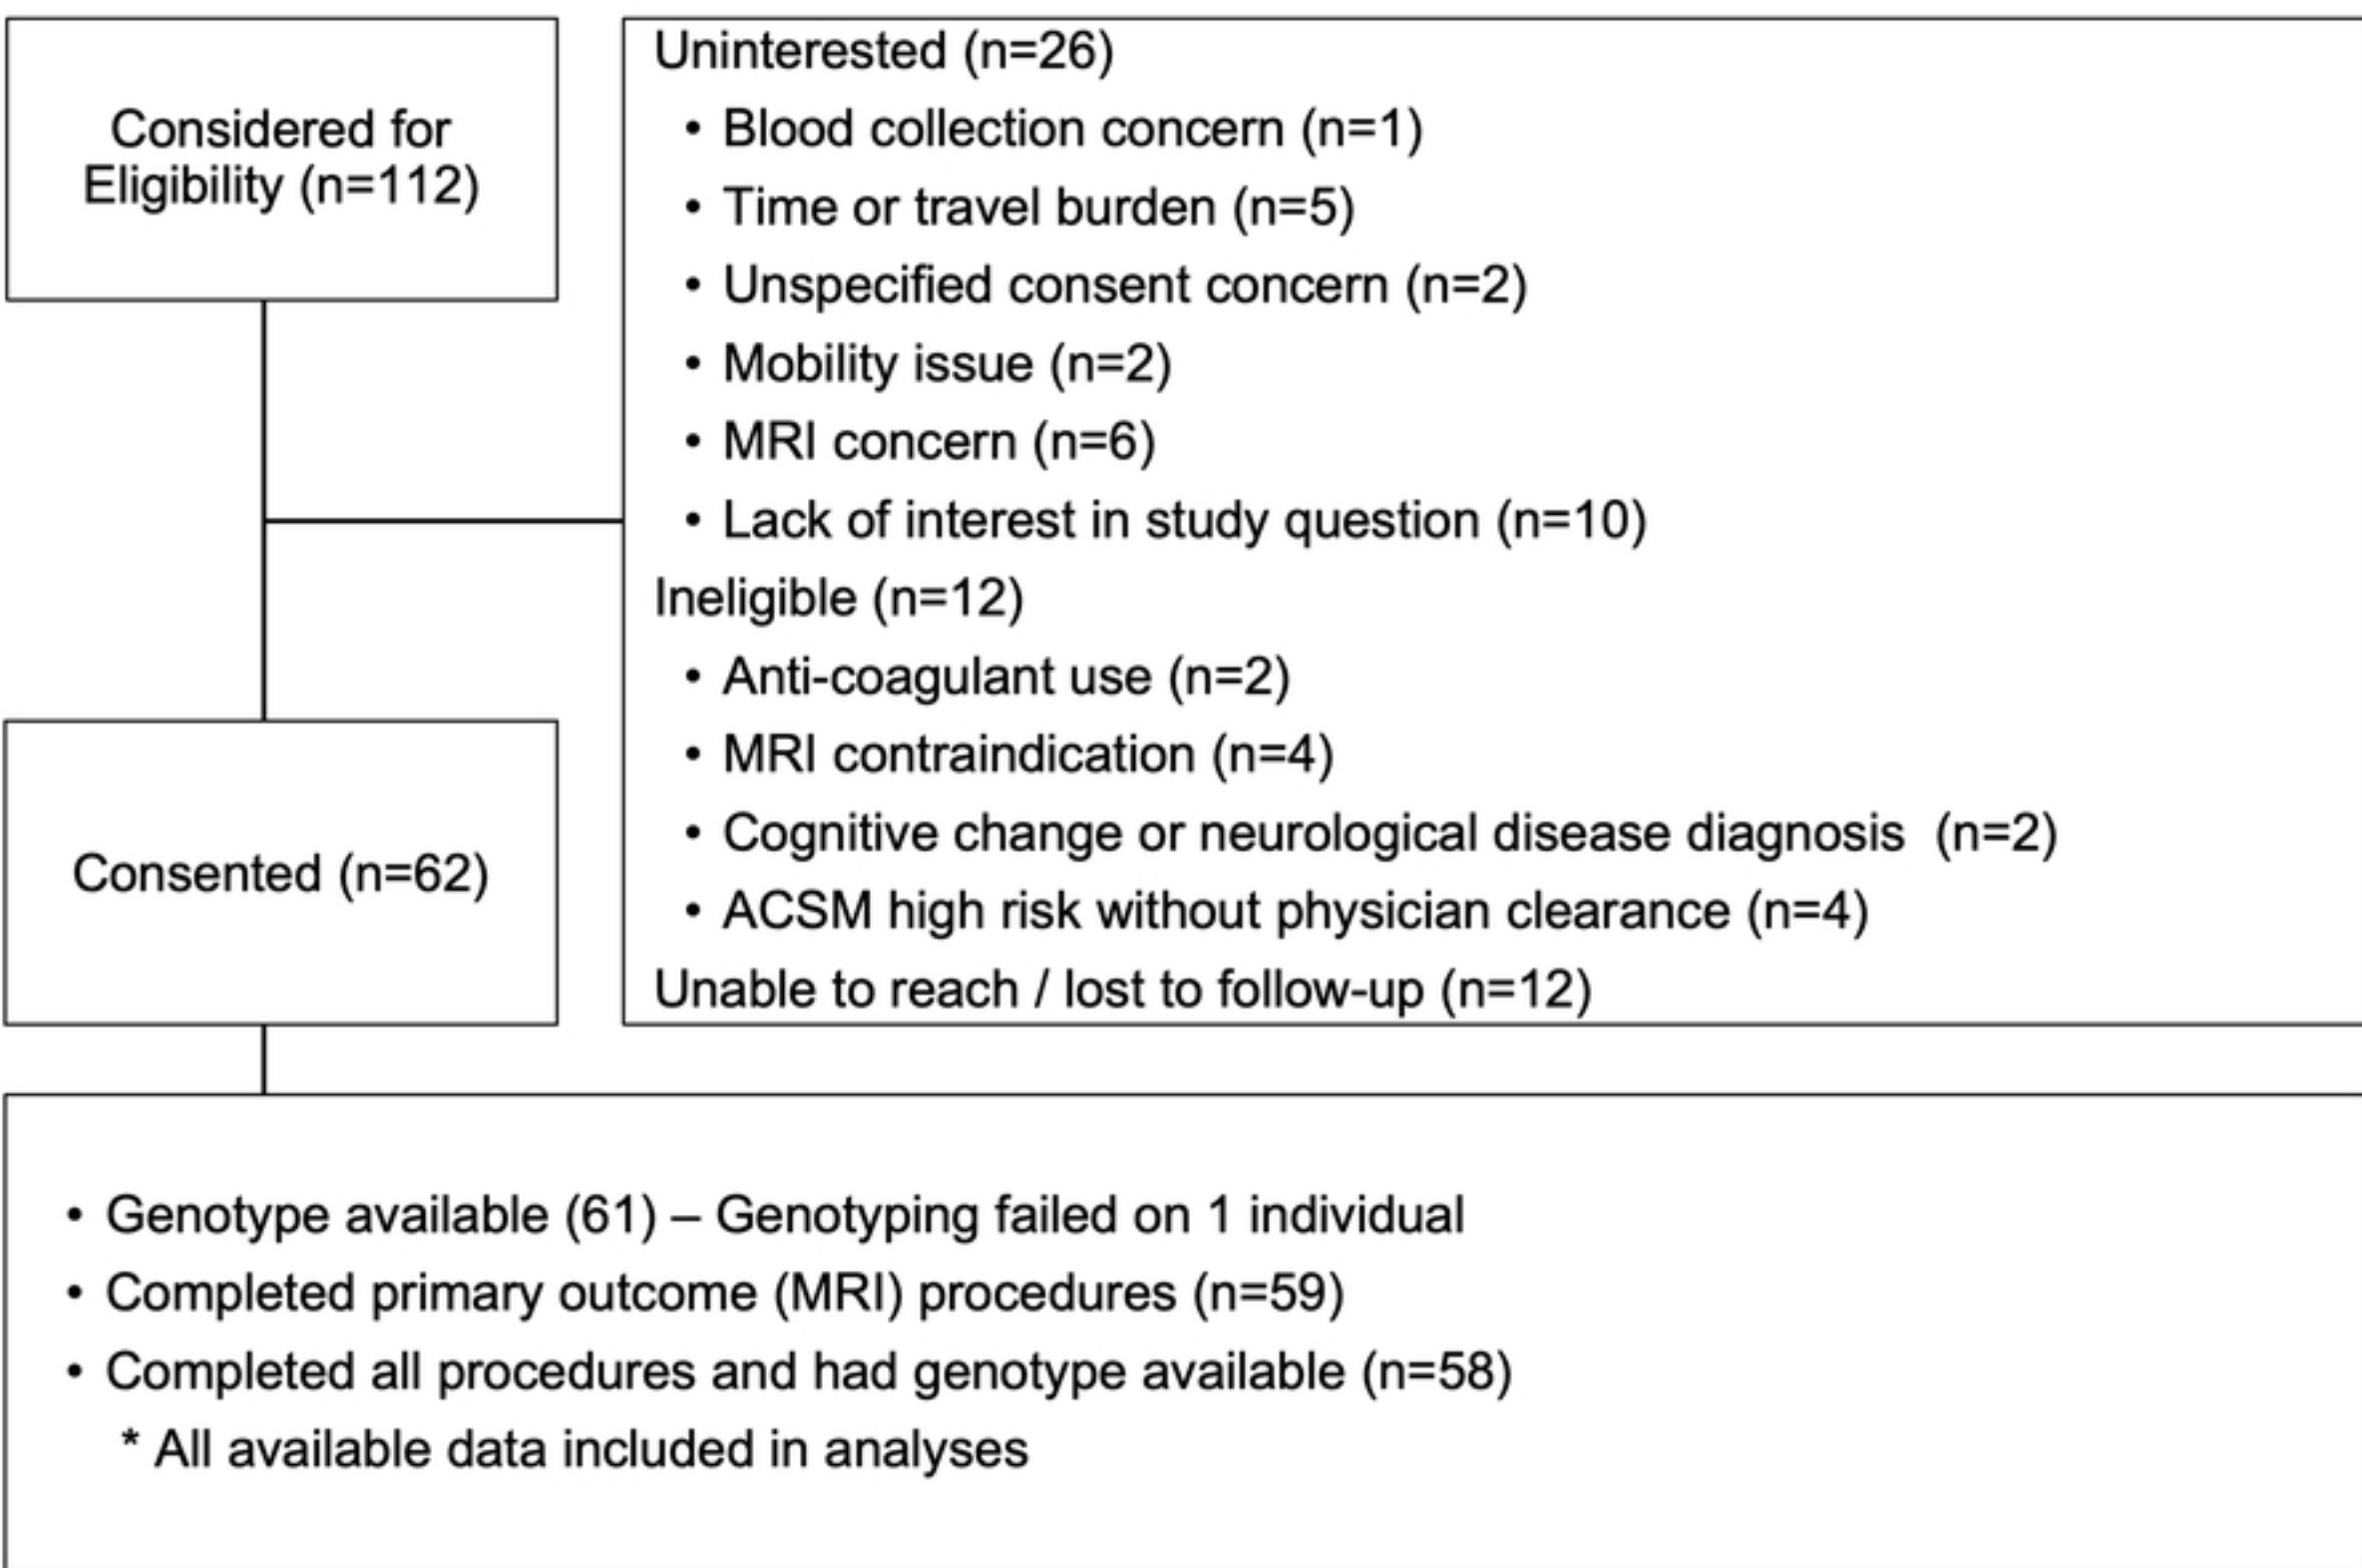

Figure 1

APOE4 Carriage

Non-carrier  
Carrier

medRxiv preprint doi: <https://doi.org/10.1101/2022.03.10.22272187>; this version posted March 13, 2022. The copyright holder for this preprint (which was not certified by peer review) is the author/funder, who has granted medRxiv a license to display the preprint in perpetuity. It is made available under a [CC-BY 4.0 International license](https://creativecommons.org/licenses/by/4.0/).

Regional Mean Cerebral Blood Flow (mL/100g tissue)

750  
500  
250  
0

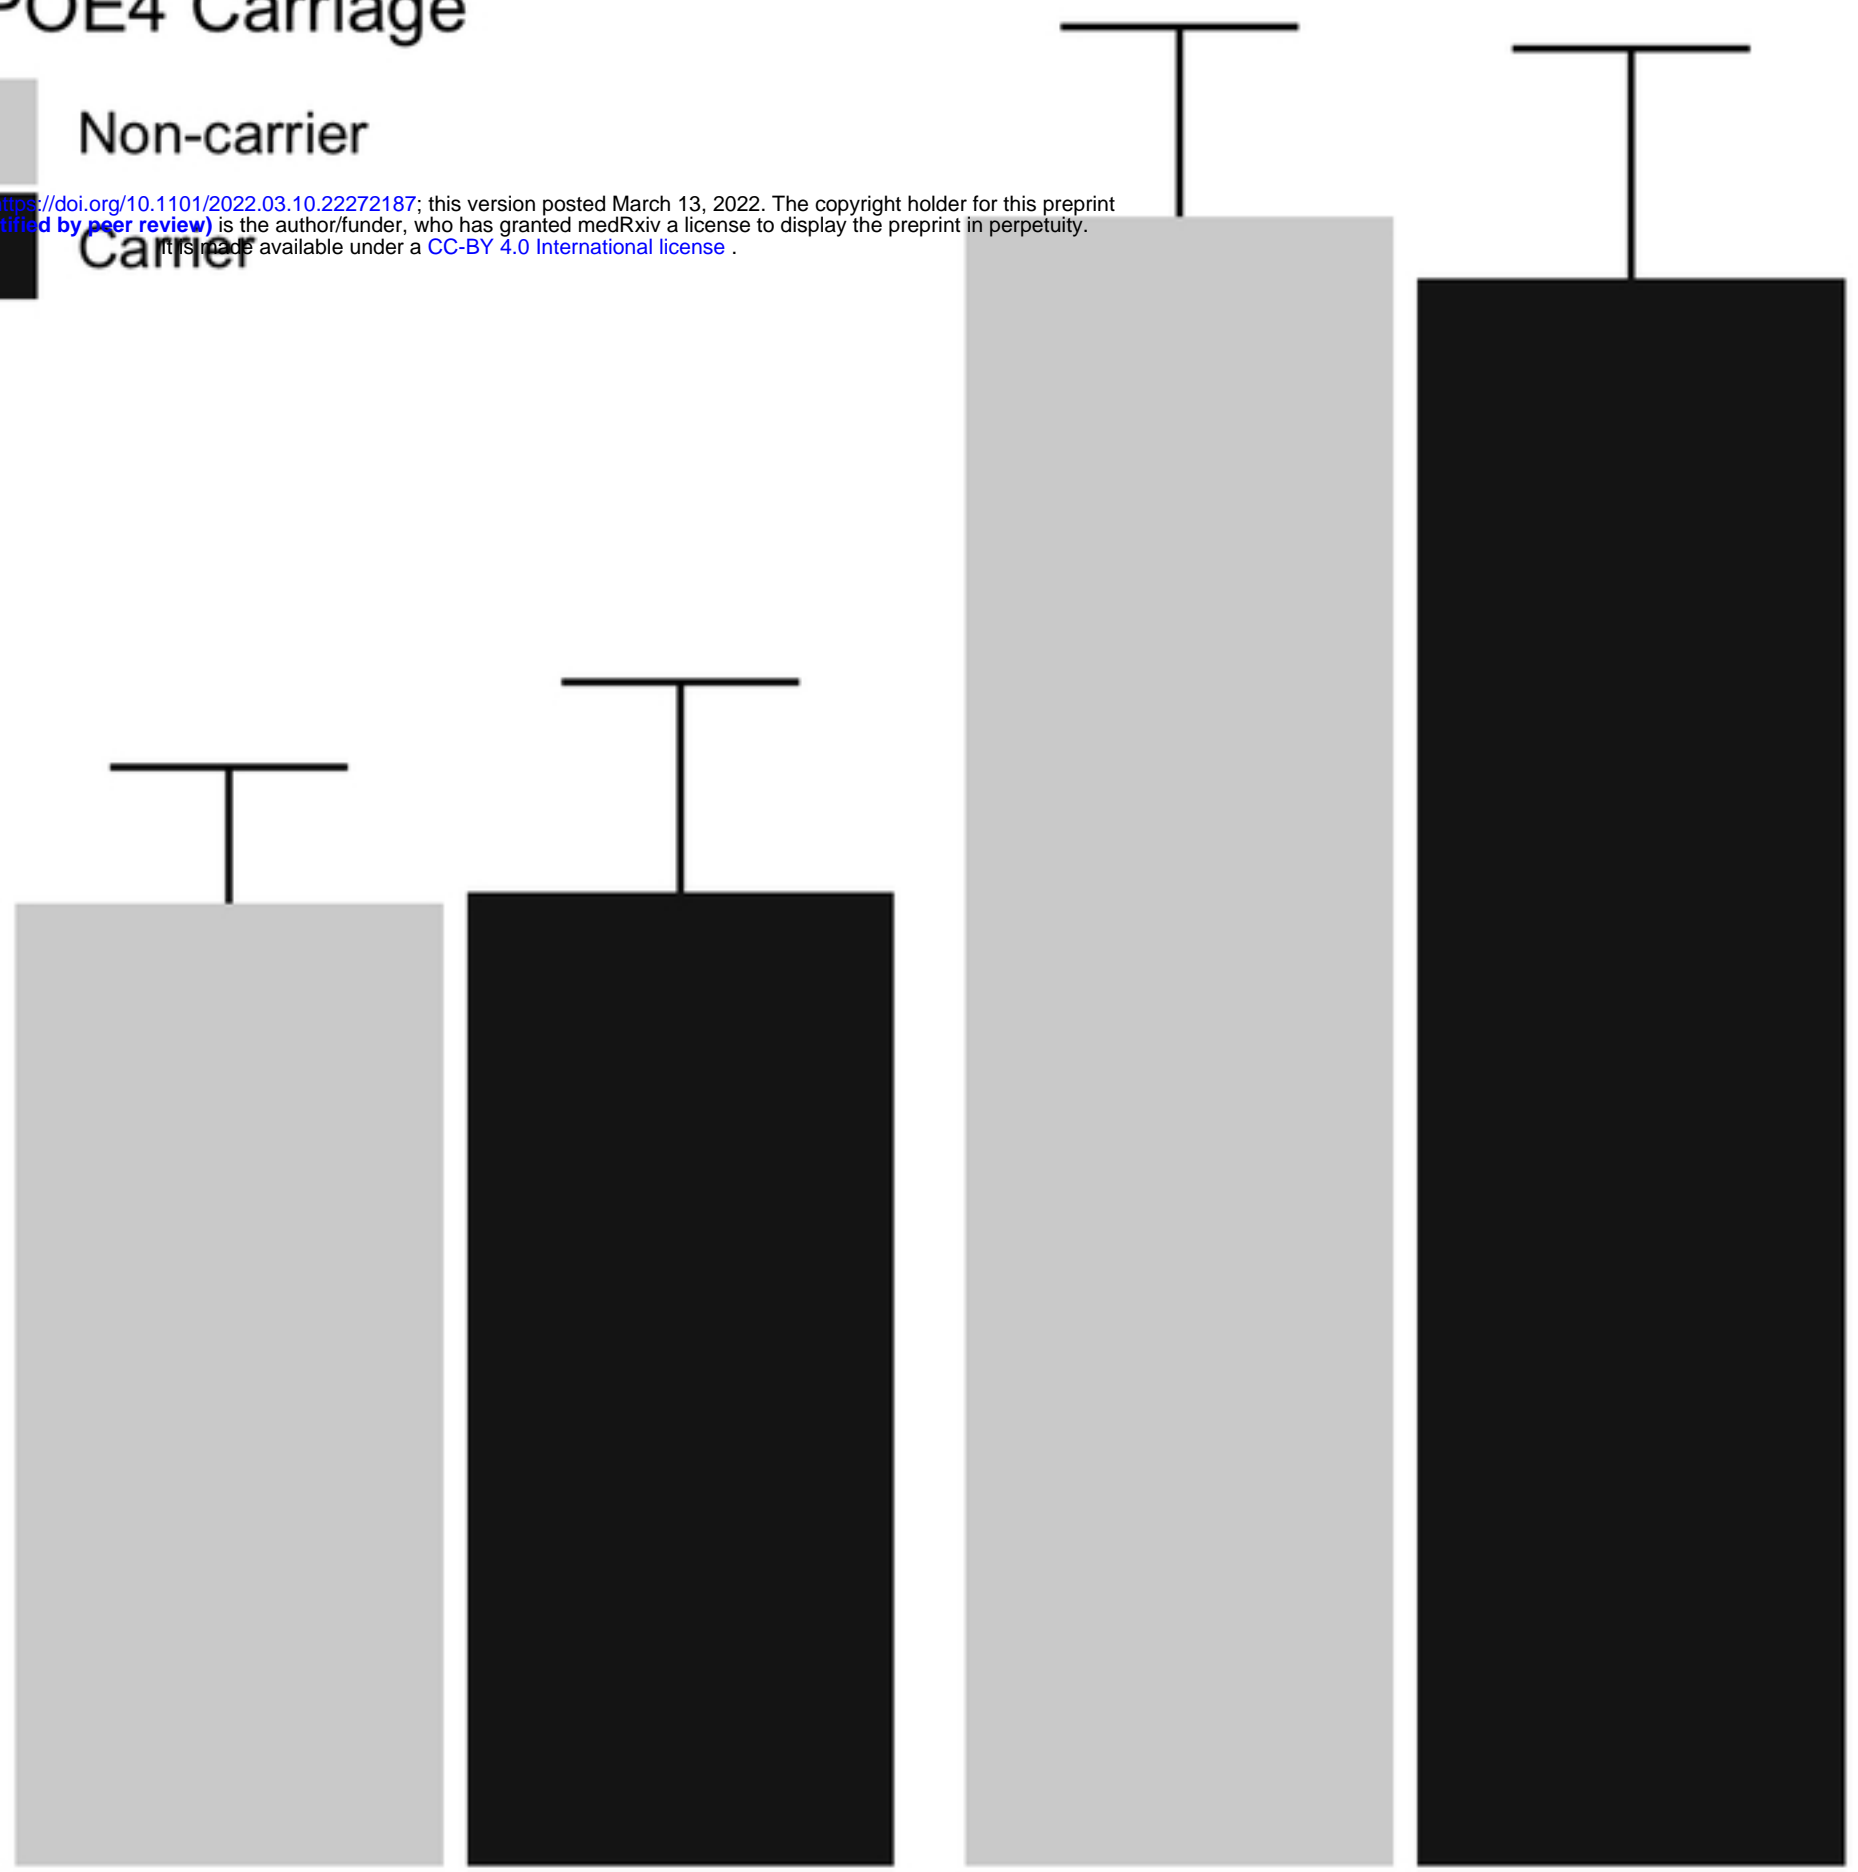

Cerebellum

Cortex

Region Gray Matter

Figure 2
